# Supplementary material for: Facile one-step synthesis of quaternary AgInZnS quantum dots and their applications for causing bioeffects and detecting Cu2+
Source: Royal Society of Chemistry journal article supplement (doi:10.1039/c9ra09840b), 2020-01-01
Supplement: c9ra09840b1.pdf [file c9ra09840b1.pdf]

Supplementary Information

**Facile one-step synthesis of quaternary AgInZnS quantum dots and their applications for bioeffect and detecting Cu<sup>2+</sup>**

Xiao-Le Han<sup>a,#,\*</sup>, Qingyu Li<sup>a,#</sup>, Hao Hao<sup>a</sup>, Chenyin Liu<sup>a</sup>, Run Li<sup>a</sup>, Fan Yu<sup>a</sup>, Jiawen Lei<sup>a</sup>, Qingqing Jiang<sup>a</sup>, Yi Liu<sup>b</sup>, JunCheng Hu<sup>a,\*</sup>

<sup>a</sup>Key Laboratory of Catalysis and Energy Materials Chemistry of Ministry of Education & Hubei Key Laboratory of Catalysis and Materials Science, South-Central University for Nationalities, Wuhan 430074, China

<sup>b</sup>State Key Laboratory of Virology & Key laboratory of Analytical Chemistry for Biology and Medicine (MOE), College of Chemistry and Molecular Sciences, Wuhan University, Wuhan 430072, P. R. China.

---

\*corresponding authors: Xiao-le Han and Juncheng Hu

<sup>a</sup> Hubei Key Laboratory of Catalysis and Materials Science, School of Chemistry and Materials Science, South-Central University for Nationalities, Wuhan 430074, China  
E-mail address: HXL1220@hotmail.com (Xiao-le Han)

jchu@mail.scuec.edu.cn (Juncheng Hu)

Table S1. Parameters of *S. cerevisiae* growth at different concentrations of QDs.

| QDs      | $c$<br>[nmol·L <sup>-1</sup> ] | $k$<br>[10 <sup>-3</sup> min <sup>-1</sup> ] | $R$   | $P_m$<br>[mW] | $Q_{total}$<br>[J] | $I$<br>[%] | $IC_{50}$<br>[nmol·L <sup>-1</sup> ] |
|----------|--------------------------------|----------------------------------------------|-------|---------------|--------------------|------------|--------------------------------------|
| O-CdTe   | 0                              | 6.80                                         | 0.998 | 2.22          | 0.79               | 0          | <b>17.07</b>                         |
|          | 4.9                            | 6.10                                         | 0.999 | 2.19          | 0.78               | 10.29      |                                      |
|          | 7.9                            | 5.40                                         | 0.997 | 1.69          | 0.84               | 20.58      |                                      |
|          | 11.9                           | 4.65                                         | 0.997 | 1.27          | 0.84               | 31.62      |                                      |
|          | 14.9                           | 3.76                                         | 0.995 | 1.14          | 0.83               | 44.70      |                                      |
|          | 29.7                           | 2.71                                         | 0.999 | 0.90          | 0.84               | 60.15      |                                      |
|          | 89.1                           | 0.05                                         | 0.997 | 0.62          | 0.85               | 92.05      |                                      |
|          | 198.1                          | 0.03                                         | 0.980 | 0.33          | 0.78               | 95.89      |                                      |
| G-CdTe   | 0                              | 7.28                                         | 0.998 | 2.35          | 0.81               |            | <b>80.81</b>                         |
|          | 28.6                           | 7.66                                         | 0.999 | 2.31          | 0.78               | -5.22      |                                      |
|          | 47.6                           | 7.25                                         | 0.997 | 2.34          | 0.81               | 0.41       |                                      |
|          | 61.9                           | 5.45                                         | 0.997 | 2.12          | 0.82               | 24.83      |                                      |
|          | 76.2                           | 4.01                                         | 0.995 | 1.67          | 0.86               | 44.69      |                                      |
|          | 95.2                           | 2.65                                         | 0.999 | 1.32          | 0.86               | 63.45      |                                      |
|          | 133.3                          | 1.07                                         | 0.997 | 0.93          | 0.85               | 85.24      |                                      |
|          | 209.4                          | 0.8                                          | 0.997 | 0.69          | 0.79               | 98.89      |                                      |
| NAC-CdTe | 0                              | 6.40                                         | 0.908 | 0.46          | 0.91               | 0          | <b>89.8</b>                          |
|          | 38.08                          | 7.39                                         | 0.999 | 0.49          | 1.01               | -15.5      |                                      |
|          | 57.12                          | 5.39                                         | 0.997 | 0.43          | 1.04               | 15.8       |                                      |
|          | 76.16                          | 4.09                                         | 0.993 | 0.37          | 1.05               | 36.1       |                                      |
|          | 95.20                          | 2.64                                         | 0.995 | 0.29          | 1.04               | 58.8       |                                      |
|          | 190.40                         | 0.53                                         | 0.992 | 0.13          | 0.88               | 91.7       |                                      |
| MPA-CdTe | 0                              | 6.10                                         | 0.998 | 0.48          | 1.22               | 0          | <b>56.2</b>                          |
|          | 6.24                           | 5.21                                         | 0.999 | 0.46          | 1.18               | 14.6       |                                      |
|          | 31.20                          | 4.20                                         | 0.997 | 0.39          | 1.28               | 31.2       |                                      |
|          | 93.60                          | 1.95                                         | 0.997 | 0.26          | 1.32               | 68.0       |                                      |
|          | 187.20                         | 0.87                                         | 0.995 | 0.20          | 1.22               | 85.7       |                                      |
|          | 312.00                         | 0.25                                         | 0.999 | 0.16          | 1.04               | 95.9       |                                      |
| GSH-CdTe | 0                              | 5.82                                         | 0.998 | 0.48          | 0.86               | 0          | <b>15.3</b>                          |
|          | 6.24                           | 4.72                                         | 0.99  | 0.45          | 0.80               | 19.9       |                                      |
|          | 12.48                          | 3.38                                         | 0.997 | 0.28          | 0.89               | 42.6       |                                      |
|          | 24.96                          | 1.48                                         | 0.997 | 0.22          | 0.88               | 71.5       |                                      |
|          | 49.92                          | 0.97                                         | 0.995 | 0.17          | 0.88               | 88.7       |                                      |
|          | 99.84                          | 0.37                                         | 0.980 | 0.09          | 0.74               | 97.2       |                                      |

Table S2. The comparison of cytotoxicity of different types of QDs to *S. cerevisiae* cells<sup>17,18</sup>

| QDs                               | O-CdTe | G-CdTe | NAC-CdTe | MPA-CdTe | GSH-CdTe | AIZS |
|-----------------------------------|--------|--------|----------|----------|----------|------|
| $IC_{50}$ [nmol·L <sup>-1</sup> ] | 17.07  | 80.81  | 89.8     | 56.2     | 15.3     | 1000 |

Table S3. Comparison of different QDs-based assays for the detection of Cu<sup>2+</sup>.

| QDs                               | Emission Peak/nm | Size/nm                          | LOD              | Dynamic Range                             | Ref. |
|-----------------------------------|------------------|----------------------------------|------------------|-------------------------------------------|------|
| <b>AIZS QDs</b>                   | <b>583</b>       | <b>3.51</b>                      | <b>100.28 nM</b> | <b>0-35 <math>\mu</math>M</b>             | -    |
| TGA-CdTe QDs                      | ~ 550            | -                                | -                | 0.1-5 $\mu$ M                             | 40   |
| Silicon quantum dots (Si QDs)     | 460              | 2.3                              | 0.5 $\mu$ M      | $5 \times 10^{-7}$ - $1 \times 10^{-5}$ M | 41   |
| GQDs@GSH-CdTe QDs                 | 420&572          | -                                | 53 nM            | 0.1-1.0 $\mu$ M                           | 13   |
| MPA-Ag <sub>2</sub> S QDs         | 695              | 2.5 $\pm$ 0.6                    | 27.6 nM          | 25 nM-10 $\mu$ M                          | 12   |
| Au@Ag NPs-CDots                   | -                | 33.8 $\pm$ 3.4/<br>3.3 $\pm$ 0.4 | 4.81 nM          | 0.005-1 $\mu$ M                           | 42   |
| Zinc-doped AgInS <sub>2</sub> QDs | 561              | 3.64                             | 27.3 nM          | 0-340 $\mu$ M                             | 43   |
| AIZS-GO nanocomposites            | ~ 600            | 5.2                              | 0.18 $\mu$ M     | 0-850 $\mu$ M                             | 44   |

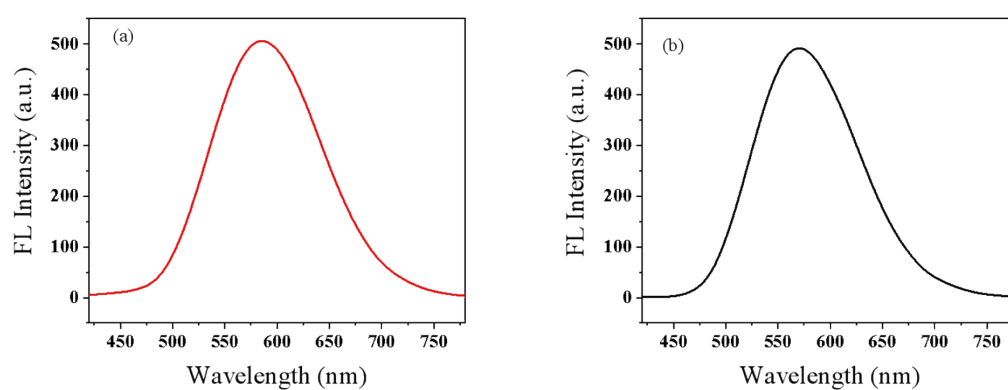

Fig. S1. The fluorescence emission spectra of AIZS QDs synthesized by adjusting the pH value (pH=8.50) of the reaction system before (a) and after (b) the addition of sodium sulfide.
